# Supplementary material
Source: PubMed Central journal article supplement (PMC5402868)
Supplement: NIHMS71887-supplement-Supporting_Information.pdf [file NIHMS71887-supplement-Supporting_Information.pdf]

# CHEMPHYSICHEM

## Supporting Information

© Copyright Wiley-VCH Verlag GmbH & Co. KGaA, 69451 Weinheim, 2011

### **A FRET Sensor for Non-Invasive Imaging of Amyloid Formation in Vivo**

Gabriele S. Kaminski Schierle,<sup>[a]</sup> Carlos W. Bertocini,<sup>[b, c]</sup> Fiona T. S. Chan,<sup>[a]</sup>  
Annemieke T. van der Goot,<sup>[d]</sup> Stefanie Schwedler,<sup>[e]</sup> Jeremy Skepper,<sup>[f]</sup> Simon Schlachter,<sup>[a]</sup>  
Tjakko van Ham,<sup>[d]</sup> Alessandro Esposito,<sup>[a]</sup> Janet R. Kumita,<sup>[b]</sup> Ellen A. A. Nollen,<sup>[d]</sup>  
Christopher M. Dobson,<sup>\*[b]</sup> and Clemens F. Kaminski<sup>\*[a, g]</sup>

cphc\_201000996\_sm\_miscellaneous\_information.pdf

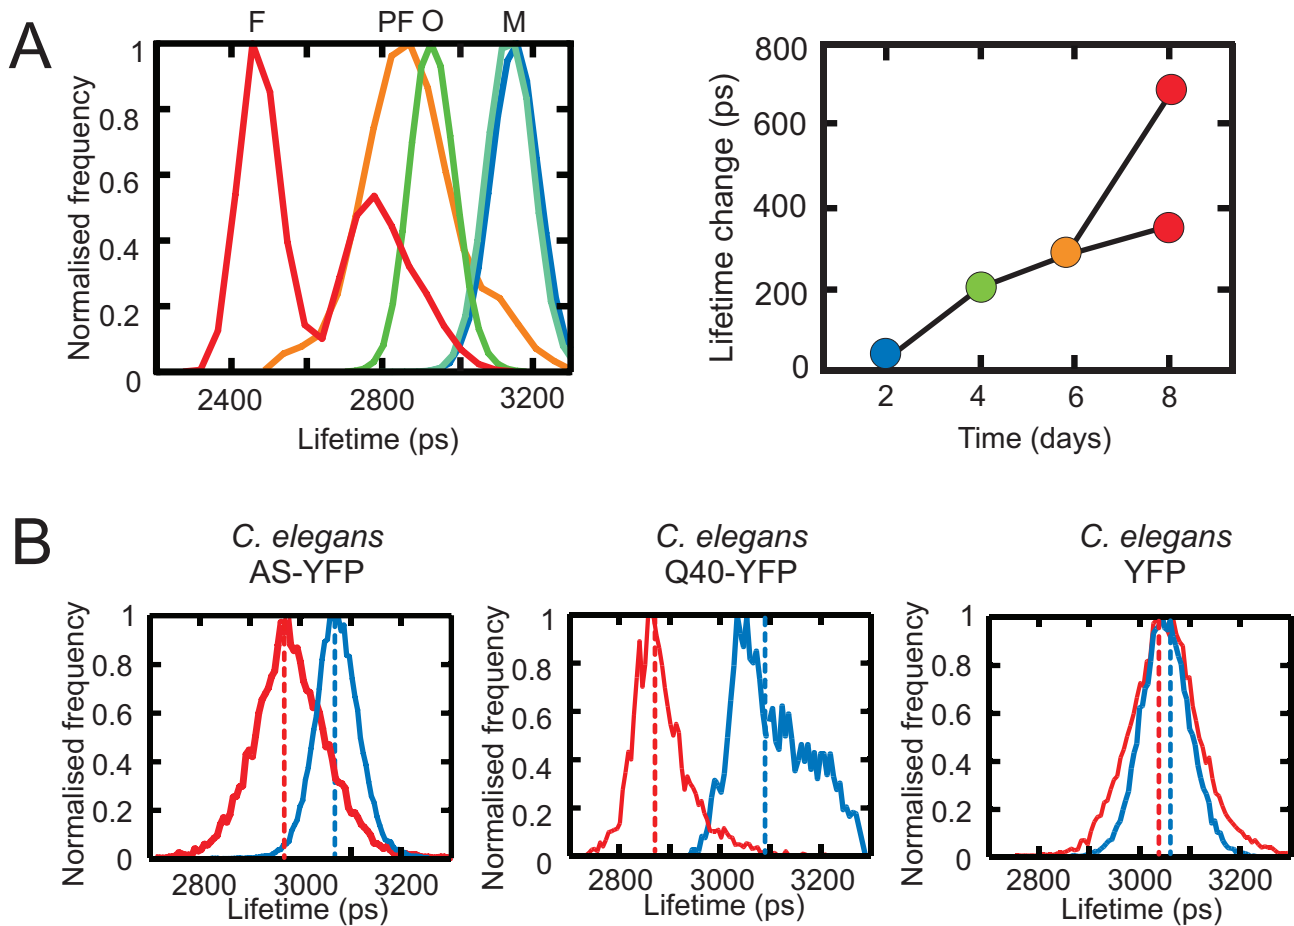

**Figure Supplementary 1. A.** Left: Histograms of the fluorescence lifetime of AS-YFP recorded at days 0 (cyan), 2 (blue), 4 (green), 6 (orange), and 8 (red) of the aggregation assay *in vitro*. The letter code on the top axis reflects the nature of the species identified by TEM and probed by fluorescence lifetime: M, monomer; O, oligomer; PF, pre-fibrillar aggregates; F, amyloid fibril. Right: Observed mean lifetime changes of AS-YFP between day 0 and day 8 of the aggregation assay. The curve connects the mean lifetime changes of AS-YFP at days 0 to 8, whereas the diversion at day 8 reflects the mean lifetimes of the two distinct peaks observed. **B.** Left: Lifetime histograms of the whole anterior part of AS-YFP transgenic *C. elegans* at day 5 (blue) and day 11 (red). Centre: Lifetime histograms of the whole anterior part of Q40-YFP transgenic *C. elegans* at day 5 (blue) and day 11 (red). Right: Lifetime histograms of the whole anterior part of the control YFP-transgenic *C. elegans* at day 5 (blue) and day 11 (red).
